# Supplementary material for: Time-Sequencing of the Neutrophil-to-Lymphocyte Ratio to Predict Prognosis of Triple-Negative Breast Cancer
Source: MDPI journal article supplement (doi:10.3390/cancers13143472), 2021-07-11
Supplement: s1 [file s1]

**Supplementary Figure S1. Inflammatory biomarkers according to survival.**

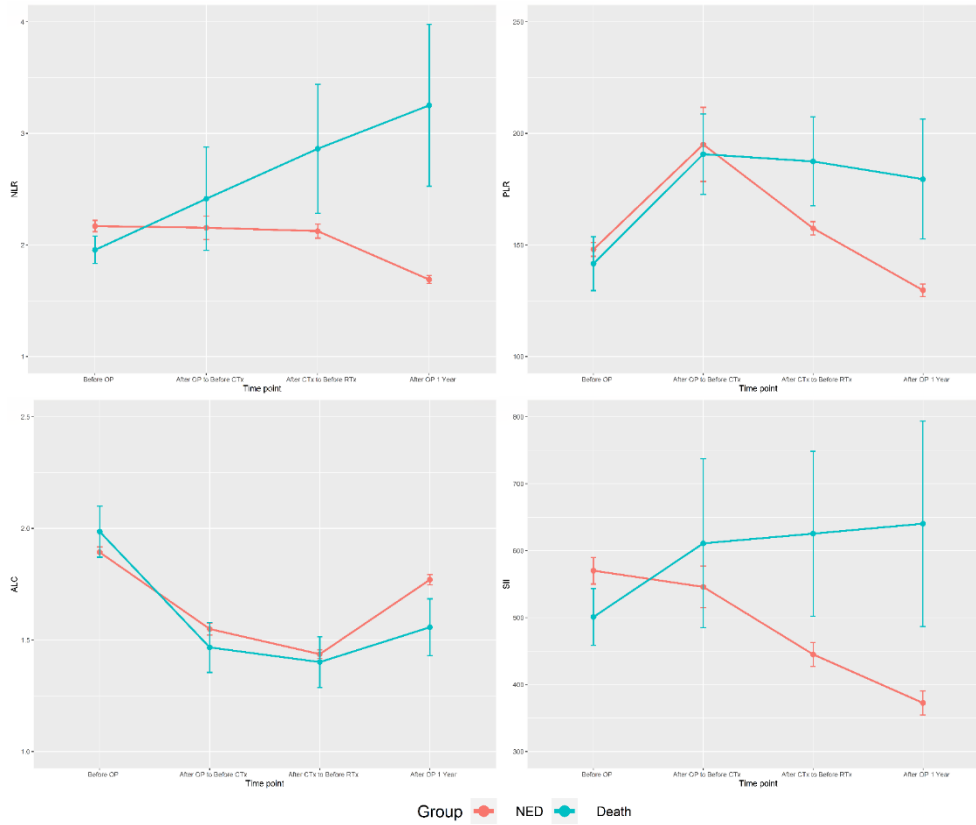

NLR: neutrophil-to-lymphocyte ratio; PLR: platelet-to-lymphocyte ratio; ALC: absolute lymphocyte count; SII: the systemic immune-inflammation index; CTx: chemotherapy; RTx: radiation therapy; NED: no evidence of disease.

**Supplementary Table S1. Linear mixed model analysis results for the patients with LVI information.**

|                                | Unadjusted model     |         | Adjusted model       |         |
|--------------------------------|----------------------|---------|----------------------|---------|
|                                | Odds ratio (95% CI)  | p-value | Odds ratio (95% CI)  | p-value |
| <b>NLR time point</b>          |                      |         |                      |         |
| Preoperative                   | 1                    | -       | 1                    | -       |
| Postoperative-before CTx       | 1.233 (1.158, 1.313) | <0.0001 | 1.218 (1.142, 1.300) | <0.0001 |
| After CTx-before RTx           | 1.270 (1.189, 1.357) | <0.0001 | 1.258 (1.174, 1.347) | <0.0001 |
| One year after surgery         | 1.322 (1.232, 1.418) | <0.0001 | 1.307 (1.218, 1.402) | <0.0001 |
| <b>CTx regimen</b>             |                      |         |                      |         |
| Non taxane-based               | 1                    | -       | 1                    | -       |
| Taxane-based                   | 1.478 (1.200, 1.821) | 0.0003  | 0.756 (0.559, 1.023) | 0.0694  |
| <b>Lymphovascular invasion</b> |                      |         |                      |         |
| Not identified                 | 1                    | -       | 1                    | -       |
| Present                        | 5.370 (4.360, 6.614) |         | 3.710 (2.864, 4.807) | <0.0001 |
| <b>T stage</b>                 |                      |         |                      |         |
| T1                             | 1                    | -       | 1                    | -       |
| T2                             | 2.643 (2.227, 3.138) | <0.0001 | 1.960 (1.615, 2.379) | <0.0001 |
| T3                             | <0.001 (<0.001, Inf) | >0.9999 | <0.001 (<0.001, Inf) | >0.9999 |

|                         |                       |         |                      |         |
|-------------------------|-----------------------|---------|----------------------|---------|
| <b>N stage</b>          |                       |         |                      |         |
| N0                      | 1                     | -       | 1                    | -       |
| N1                      | 1.420 (1.076, 1.873)  | 0.0133  | 1.280 (0.888, 1.845) | 0.1848  |
| N2                      | 9.583 (6.501, 14.127) | <0.0001 | 5.022 (3.087, 8.168) | <0.0001 |
| N3                      | 6.389 (4.128, 9.889)  | <0.0001 | 3.586 (2.209, 5.821) | <0.0001 |
| <b>Histologic grade</b> |                       |         |                      |         |
| Low (Grade 1)           | 1                     | -       | 1                    | -       |
| High (Grade 2~3)        | 2.621 (2.007, 3.423)  | <0.0001 | 2.493 (1.867, 3.329) | <0.0001 |

---

CI: confidence interval; NLR: neutrophil-to-lymphocyte ratio; CTx: chemotherapy; RTx: radiation therapy; LVI: lymphovascular invasion, N=425.
